# Supplementary material for: Structures, photoluminescence and photocatalytic properties of three new metal–organic frameworks based on non-rigid long bridges
Source: Royal Society of Chemistry journal article supplement (doi:10.1039/b821263e), 2009-01-01
Supplement: b821263e.pdf [file b821263e.pdf]

# Structures, Photoluminescence and Photocatalytic Properties of Three New Metal-Organic Frameworks Based on Non-Rigid Long Bridges

Dong-E Wang<sup>a</sup>, Ke-Jian Deng<sup>b</sup>, Kang-Le Lv<sup>b</sup>, Cheng-Gang Wang<sup>a</sup>, Li-Li Wen<sup>a,c\*</sup>,  
Dong-Feng Li<sup>a,c\*</sup>

<sup>a</sup> College of Chemistry, Central China Normal University, Wuhan, 430079, P.R. China

<sup>b</sup> Key Laboratory of Catalysis and Materials Science of the State Ethnic Affairs Commission & Ministry of Education, South-Central University for Nationalities, Wuhan 430074, P.R. China

<sup>c</sup> Coordination Chemistry Institute, State Key Laboratory of Coordination Chemistry, School of Chemistry and Chemical Engineering, Nanjing University, Nanjing 210093, P. R. China

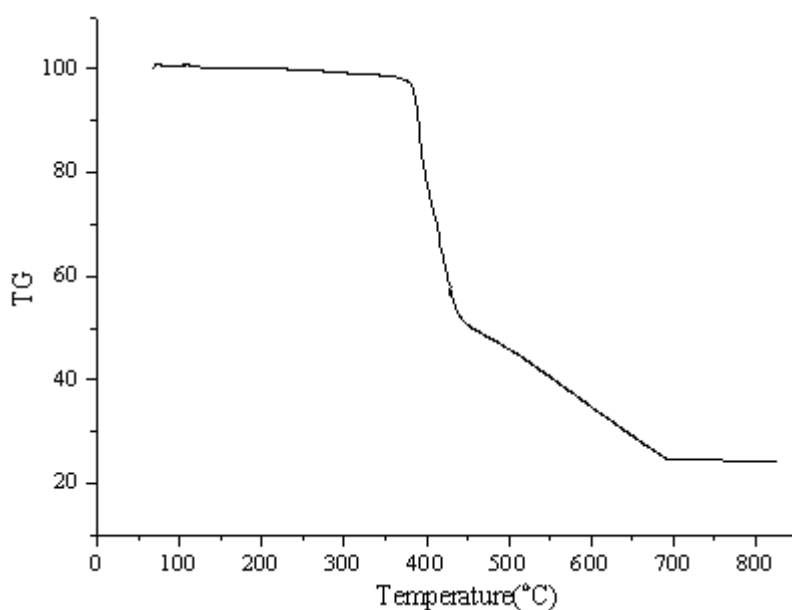

Fig. S1 TG curve of compound 1.

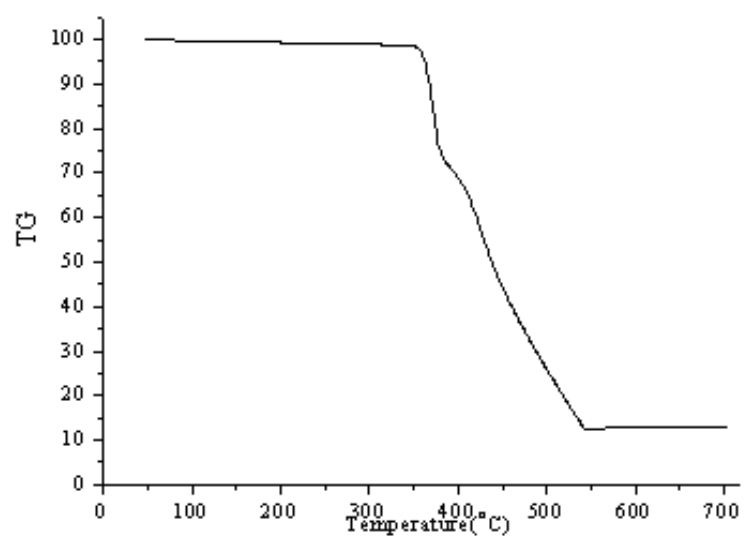

Fig. S2 TG curve of compound **2**.

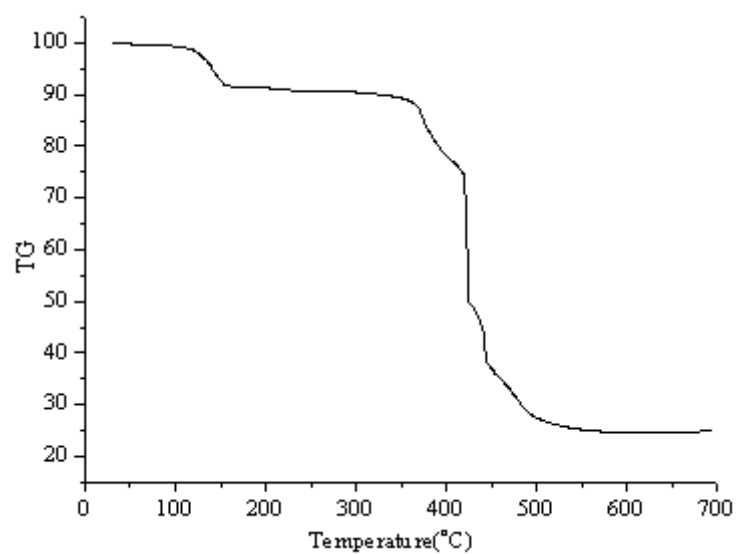

Fig. S3 TG curve of compound **3**.
